# Supplementary material for: Nicotine enhances the stemness and tumorigenicity in intestinal stem cells via Hippo-YAP/TAZ and Notch signal pathway
Source: eLife. 2025 Jan 3;13:RP95267. doi: 10.7554/eLife.95267 (PMC11698494; doi:10.7554/eLife.95267)
Supplement: Figure 1—figure supplement 1—source data 1. [file elife-95267-fig1-figsupp1-data1.xlsx]

## Sheet: Figure 1-figure supplement 1A
	Villus Length	Control	NIC		Depth of Crypts	Control	NIC
	①	428.573	318.729		①	89.1462	96.914
	②	399.016	271.342		②	87.8227	107.363
	③	374.053	293.357		③	99.3164	120.752
	④	455.131			④	99.3702
	AVERAGE	414.193	294.476		AVERAGE	93.9139	108.343
	SE	17.6168	13.6907		SE	3.14634	6.89891

## Sheet: Figure 1-figure supplement 1B
	Count	Control	NIC
	①	161.8	116.4
	②	158.92	130.26
	③	164.84	129.58
	AVERAGE	161.853	125.413
	SE	1.70916	4.51094

## Sheet: Figure 1-figure supplement 1C
	Count	Control	NIC
	①	2.51	1.50495
	②	2.61111	1.58252
	③	2.42342	1.65347
	AVERAGE	2.51484	1.57845
	SE	0.0542349	0.0428868
