# Supplementary material for: Nicotine enhances the stemness and tumorigenicity in intestinal stem cells via Hippo-YAP/TAZ and Notch signal pathway
Source: eLife. 2025 Jan 3;13:RP95267. doi: 10.7554/eLife.95267 (PMC11698494; doi:10.7554/eLife.95267)
Supplement: Figure 1—source data 1. [file elife-95267-fig1-data1.xlsx]

## Sheet: Figure 1A
	Count	Control	Nicotine
	①	14.38	18.18
	②	14.1	18.86
	③	16.04	18.3
	④	14.84
	AVERAGE	14.84	18.4467
	SE	0.428097	0.20955

## Sheet: Figure 1B
	Count	Control	Nicotine
	①	10.6	14.84
	②	11	15.18
	③	12.5	15.1
	AVERAGE	11.3667	15.04
	SE	1.11732	0.102632

## Sheet: Figure 1C
	Count	Control	Nicotine
	①	4.62	5.84
	②	4.42	5.7
	③	4.36	5.62
	④	4.8
	AVERAGE	4.55	5.72
	SE	0.100167	0.064291

## Sheet: Figure 1D
	Count	Control	Nicotine
	①	2.76	4.58
	②	2.46	4.46
	③	2.92	4.66
	AVERAGE	2.71333	4.56667
	SE	0.134825	0.0581187

## Sheet: Figure 1E
	Count	Control	Nicotine
	①	3.02429	2.83794
	②	2.96413	3.18391
	③	3.125	2.89252
	④	2.7767
	AVERAGE	2.97253	2.97146
	SE	0.0732272	0.107387
