# Supplementary material for: Nicotine enhances the stemness and tumorigenicity in intestinal stem cells via Hippo-YAP/TAZ and Notch signal pathway
Source: eLife. 2025 Jan 3;13:RP95267. doi: 10.7554/eLife.95267 (PMC11698494; doi:10.7554/eLife.95267)
Supplement: Figure 2—figure supplement 1—source data 1. [file elife-95267-fig2-figsupp1-data1.xlsx]

## Sheet: Figure 2-figure supplement 1
	Ratio	Control STEM+Control PANETH	Control STEM+NIC PANETH	NIC STEM+Control PANETH	NIC STEM+NIC PANETH
	①	0.818182	2.09091	0.772727	1.77273
	②	1.27273	2.59091	0.954545	2.31818
	③	0.909091	2.36364	1	2.54545
	AVERAGE	1	2.34848	0.909091	2.21212
	SE	0.138866	0.144536	0.069433	0.229284
