# Supplementary material for: Nicotine enhances the stemness and tumorigenicity in intestinal stem cells via Hippo-YAP/TAZ and Notch signal pathway
Source: eLife. 2025 Jan 3;13:RP95267. doi: 10.7554/eLife.95267 (PMC11698494; doi:10.7554/eLife.95267)
Supplement: Figure 2—source data 1. [file elife-95267-fig2-data1.xlsx]

## Sheet: Figure 2A
	Count	Control	Nicotine 10μM	Nicotine 1μM	Nicotine 100nM	cotinine 10μM	cotinine 1μM	cotinine 100nM
	①	275	423	466	316	293	273	258
	②	293	413	454	392	278	319	281
	③	288	381	419	387	288	256	275
	AVERAGE	285.333	405.667	446.333	365	286.333	282.667	271.333
	SE	5.36449	12.6667	14.0989	24.5425	4.40959	18.8178	6.88799

## Sheet: Figure 2B
	Count	Control	Nicotine
	①	48	112
	②	54	123
	③	78	139
	AVERAGE	60	124.667
	SE	9.16515	7.83865

## Sheet: Figure 2C
	Count	Control STEM	Control STEM+Control PANETH	Control STEM+NIC PANETH	NIC STEM	NIC STEM+Control PANETH	NIC STEM+NIC PANETH
	①	110	204	265	201	354	314
	②	142	165	234	189	341	360
	③	116	238	221	207	354	368
	AVERAGE	122.667	202.333	240	199	349.667	347.333
	SE	9.82061	21.0898	13.0512	5.2915	4.33333	16.8259

## Sheet: Figure 2D
	Count	Control	Nicotine
	①	83	148
	②	85	147
	③	107	158
	AVERAGE	91.6667	151
	SE	7.68838	3.51188
