# Supplementary material for: Nicotine enhances the stemness and tumorigenicity in intestinal stem cells via Hippo-YAP/TAZ and Notch signal pathway
Source: eLife. 2025 Jan 3;13:RP95267. doi: 10.7554/eLife.95267 (PMC11698494; doi:10.7554/eLife.95267)
Supplement: Figure 3—source data 1. [file elife-95267-fig3-data1.xlsx]

## Sheet: Figure 3A
	Ratio	Control	Mecamylamine	Nicotine	Nicotine+Mecamylamine
	①	1.02827	1.07597	1.4417	0.75265
	②	0.89576	0.996466	1.42049	1.04417
	③	1.07597	0.922261	1.62721	0.810954
	AVERAGE(ratio)	1	0.998233	1.49647	0.869258
	SE(ratio)	0.0539086	0.0443811	0.0656569	0.0890607
	p value	0.00427512		0.00477664

## Sheet: Figure 3B
	Ratio	Control	Adiphenine	Nicotine	Nicotine+Adiphenine
	①	0.986737	1.09814	1.87798	1.94164
	②	0.923077	0.954907	1.81432	1.55968
	③	1.09019	0.994695	1.687	1.77454
	AVERAGE(ratio)	1	1.01592	1.7931	1.75862
	SE(ratio)	0.0486938	0.0426883	0.0561433	0.11055

## Sheet: Figure 3C
	Ratio	Control STEM	NIC STEM	Control PANETH	NIC PANETH		SE	Control STEM	NIC STEM	Control PANETH	NIC PANETH		p value	p value(Control STEM and NIC STEM)	p value (Control STEM and Control PANETH)	p value (Control STEM and NIC PANETH)
	α1	1	1.05706	2.17738	3.46039		α1	0.295539	0.508727	1.46882	1.99323		α1	0.909032	0.214356	0.451306
	α2	0.236248	0.120309	0.147256	0.124663		α2	0.290039	0.151279	0.34214	0.148082		α2	0.570945	0.75173	0.583842
	α3	0.10017	0.0507395	0.375353	0.39385		α3	0.141954	0.0891708	0.417948	0.246271		α3	0.626583	0.286632	0.211201
	α4	5.89526	3.49229	1.78828	1.55699		α4	6.65177	1.13311	1.61265	2.4524		α4	0.534099	0.263467	0.303369
	α5	0.15752	0.558724	0.965861	1.1283		α5	0.0999157	0.737411	0.882452	1.23521		α5	0.229997	0.0564731	0.0573673
	α6	3.46618	6.14529	2.55428	2.57354		α6	5.6201	9.25454	3.5066	3.80524		α6	0.678482	0.819472	0.827677
	α7	16.848	51.256	16.8119	15.0541		α7	5.54645	11.4017	13.5251	17.1074		α7	0.0127234	0.99747	0.892988
	α9	29.8102	33.9267	33.7913	42.9344		α9	11.8994	17.3361	20.5524	21.5277		α8	0.814066	0.834816	0.508547
	α10	7.25133	4.83504	7.60841	7.39738		α10	3.71459	2.34452	3.65573	2.85293		α10	0.498841	0.934877	0.97073
	β1	0.38326	0.75262	0.891742	1.03093		β1	0.97332	1.86054	1.6482	1.20469		β1	0.713545	0.620771	0.523181
	β2	1.08369	1.03975	1.36945	1.36432		β2	2.01041	1.32242	2.24074	2.04755		β2	0.975967	0.87392	0.872811
	β3	1.93321	0.80281	2.09698	2.90536		β3	1.33533	1.13592	0.989381	1.63956		β3	0.41671	0.903832	0.571183
	β4	3.53963	4.42965	6.85396	7.86975		β4	0.806232	0.407661	1.90208	4.43843		β4	0.344544	0.0724398	0.14308

## Sheet: Figure 3E
	Ratio	Control	PNU282987
	①	0.935509	1.72141
	②	1.04782	1.50936
	③	1.01663	1.55215
	AVERAGE(ratio)	1	1.60291
	SE(ratio)	0.0334584	0.0624739

## Sheet: Figure 3F 
	Ratio	Control	Bungarotoxin	Nicotine	Nicotine+Bungarotoxin
	①	0.922179	1.04475	2.00195	1.05642
	②	1.06809	0.980545	1.49416	0.992218
	③	1.00973	1.00389	2.02529	1.17899
	AVERAGE(ratio)	1	1.00973	1.84047	1.07588
	SE(ratio)	0.0424017	0.018762	0.173283	0.0547865
