# Supplementary material for: Nicotine enhances the stemness and tumorigenicity in intestinal stem cells via Hippo-YAP/TAZ and Notch signal pathway
Source: eLife. 2025 Jan 3;13:RP95267. doi: 10.7554/eLife.95267 (PMC11698494; doi:10.7554/eLife.95267)
Supplement: Figure 4—figure supplement 1—source data 1. [file elife-95267-fig4-figsupp1-data1.xlsx]

## Sheet: Figure 4-figure supplement 1A
	Ratio	Control	Sotrastaurin	Nicotine	Nicotine+Sotrastaurin
		0.849684	1.00633	1.90348	1.13212
		1.15585	1.13924	1.73497	0.873418
		0.994462	1.03006	1.73734	1.15348
	AVERAGE(ratio)	1	1.05854	1.79193	1.05301
	SE(ratio)	0.0884273	0.0409257	0.0557795	0.0900058

## Sheet: Figure 4-figure supplement 1C
	Ratio	Control	AKT I	Nicotine	Nicotine+AKT I
	①	0.800613	0.957055	1.56442	1.41718
	②	0.93865	0.957055	1.5184	1.36196
	③	1.26074	0.920245	1.8773	1.84049
	AVERAGE(ratio)	1	0.944785	1.65337	1.53988
	SE(ratio)	0.136322	0.0122699	0.112748	0.15115

## Sheet: Figure 4-figure supplement 1D
	Ratio	Control	SB203580	Nicotine	Nicotine+SB203580
	①	1.31148	1.36066	2.59016	2.63934
	②	0.852459	0.836066	1.81967	1.65574
	③	0.836066	0.934426	1.62295	1.77049
	AVERAGE(ratio)	1	1.04372	2.01093	2.02186
	SE(ratio)	0.15581	0.160994	0.295133	0.310515

## Sheet: Figure 4-figure supplement 1E
	Ratio	Control	Rapamycin	Nicotine	Nicotine+Rapamycin
	①	1.11628	1.2093	2	1.91473
	②	1.04651	1.02326	1.78295	1.65116
	③	0.837209	0.914729	1.3876	1.51938
	AVERAGE(ratio)	1	1.0491	1.72351	1.69509
	SE(ratio)	0.08385	0.086012	0.179266	0.116222
