# Supplementary material for: Nicotine enhances the stemness and tumorigenicity in intestinal stem cells via Hippo-YAP/TAZ and Notch signal pathway
Source: eLife. 2025 Jan 3;13:RP95267. doi: 10.7554/eLife.95267 (PMC11698494; doi:10.7554/eLife.95267)
Supplement: Figure 4—source data 1. [file elife-95267-fig4-data1.xlsx]

## Sheet: Figure 4A
	Ratio	Control	H89	Nicotine	Nicotine+H89
	①	1.03004	0.824034	1.85408	1.99571
	②	1.00429	1.00429	1.95708	1.81545
	③	0.965665	0.927039	1.8927	1.96996
	AVERAGE(ratio)	1	0.918455	1.90129	1.92704
	SE(ratio)	0.0187077	0.0522126	0.0300429	0.056287

## Sheet: Figure 4B
	Ratio	Control	Gö 6983	Nicotine	Nicotine+Gö 6983
	①	1.13305	1.03004	1.7897	0.914163
	②	0.927039	1.1073	1.63519	0.965665
	③	0.939914	0.95279	1.66094	1.14592
	AVERAGE(ratio)	1	1.03004	1.69528	1.00858
	SE(ratio)	0.0666274	0.0446022	0.047792	0.0702605
	p value	0.00106034		0.00127397

## Sheet: Figure 4D
	Ratio	Control STEM	Nicotine STEM	Control PANETH	Nicotine PANETH		SE	Control STEM	Nicotine STEM	Control PANETH	Nicotine PANETH		p value	p value(Control STEM and NIC STEM)	p value (Control STEM and Control PANETH)	p value (Control STEM and NIC PANETH)
	Hes1	1	2.11725	0.6516	0.671276		Hes1	0.350456	0.457733	0.608495	0.347459		Hes1	0.0099233	0.545233	0.397525
	Hes5	1	2.9683	1.41172	2.10517		Hes5	0.330785	1.29818	0.601931	1.39276		Hes5	0.0417599	0.472708	0.238228
	HeyL	1	2.68096	1.63469	2.0984		HeyL	0.33447	1.22058	0.741468	1.29498		HeyL	0.0230593	0.306909	0.208769
	Hey1	1	3.82159	3.17029	2.77225		Hey1	0.25408	0.820649	1.3115	2.20468		Hey1	0.0112072	0.0331123	0.156028
	Jagged1	1	2.29929	5.14249	4.57247		Jagged1	0.285049	0.749732	6.35965	5.19462		Jagged1	0.0451175	0.0931305	0.0995933
	Jagged2	1	2.6363	6.33863	5.33719		Jagged2	0.256541	0.74	3.26739	1.36626		Jagged2	0.0252507	0.0045381	0.00080953
	YAP	1	3.06716	1.2079	1.25144		YAP	0.326291	1.58634	0.754029	1.06422		YAP	0.00735276	0.733697	0.741375
	TAZ	1	3.15035	1.8378	2.05999		TAZ	0.170773	0.362413	0.612862	1.0546		TAZ	0.049433	0.16964	0.186856
