# Supplementary material for: Nicotine enhances the stemness and tumorigenicity in intestinal stem cells via Hippo-YAP/TAZ and Notch signal pathway
Source: eLife. 2025 Jan 3;13:RP95267. doi: 10.7554/eLife.95267 (PMC11698494; doi:10.7554/eLife.95267)
Supplement: Figure 5—source data 1. [file elife-95267-fig5-data1.xlsx]

## Sheet: Figure 5A
	Ratio	Control	K-975	Nicotine	Nicotine+K-975
	①	0.902821	0.884013	1.4953	0.940439
	②	1.0815	0.902821	1.66458	0.912226
	③	1.01567	0.92163	1.85266	1.10031
	AVERAGE(ratio)	1	0.902821	1.67085	0.984326
	SE(ratio)	0.0521734	0.0108593	0.103211	0.0585628
	p value	0.00439257		0.00443566

## Sheet: Figure 5B
	Ratio	Control	MK-0752	Nicotine	Nicotine+MK-0752
	①	0.881517	1.03791	1.59242	1.08057
	②	1.08057	0.995261	1.70616	1.05213
	③	1.03791	0.909953	1.87678	0.938389
	AVERAGE(ratio)	1	0.981043	1.72512	1.0237
	SE(ratio)	0.0605078	0.0376173	0.0826332	0.0434367
	p value	0.00210068		0.00167937

## Sheet: Figure 5C
	Ratio	Control	K-975	PNU282987	PNU282987+K-975
	①	1.07273	0.963636	2.00909	1.02727
	②	0.972727	0.872727	2.09091	0.9
	③	0.954545	0.972727	2	1.03636
	AVERAGE(ratio)	1	0.936364	2.03333	0.987879
	SE(ratio)	0.0367405	0.0319262	0.0289072	0.0440177
	p value	2.47962e-05		3.7982e-05

## Sheet: Figure 5D
	Ratio	Control	MK-0752	PNU282987	PNU282987+MK-0752
	①	0.878571	0.942857	1.84286	1.32857
	②	1.13571	1.09286	1.73571	0.857143
	③	0.985714	1.07143	1.54286	0.9
	AVERAGE(ratio)	1	1.03571	1.70714	1.02857
	SE(ratio)	0.0745736	0.0468388	0.0877729	0.150509
	p value	0.00356784		0.0176215

## Sheet: Figure 5E
	Ratio	Control	K-975	Ingenol	Ingenol+K-975
	①	1.05118	1.1752	1.47638	0.980315
	②	0.891732	1.25197	1.6122	1.19882
	③	1.05709	0.992126	1.42323	1.11614
	AVERAGE(ratio)	1	1.13976	1.50394	1.09843
	SE(ratio)	0.0541607	0.0770739	0.0562662	0.0636956
		p value	0.00296945		0.00883112

## Sheet: Figure 5F
	Ratio	Control	MK-0752	Ingenol	Ingenol+MK-0752
	①	1.06357	1.0709	1.31663	0.850856
	②	0.953545	0.700489	1.42298	0.781174
	③	0.982885	0.777506	1.25061	0.711491
	AVERAGE(ratio)	1	0.849633	1.33007	0.781174
	SE(ratio)	0.0328939	0.112848	0.0502116	0.040231
	p value	0.00533245		0.00103599
