# Supplementary material for: Nicotine enhances the stemness and tumorigenicity in intestinal stem cells via Hippo-YAP/TAZ and Notch signal pathway
Source: eLife. 2025 Jan 3;13:RP95267. doi: 10.7554/eLife.95267 (PMC11698494; doi:10.7554/eLife.95267)
Supplement: Figure 6—figure supplement 1—source data 1. [file elife-95267-fig6-figsupp1-data1.xlsx]

## Sheet: Figure 6-figure supplement 1A
	Count	Control Vehicle	Control DBZ	NIC Vehicle	NIC DBZ
	①	10.9	10.8	13.8	11.04
	②	12.04	10.92	14.68	11.92
	③	11.2	10.66	14.22	11.4
	AVERAGE(ratio)	11.38	10.7933	14.2333	11.4533
	SE(ratio)	0.341174	0.0751295	0.254122	0.25543

## Sheet: Figure 6 -figure supplement 1B
	Count	Control Vehicle	Control DBZ	NIC Vehicle	NIC DBZ
	①	2.84	2.8	4.24	2.74
	②	2.52	2.6	4.36	2.58
	③	2.84	3.2	4.32	3.18
	AVERAGE(ratio)	2.73333	2.86667	4.30667	2.83333
	SE(ratio)	0.106667	0.176383	0.0352767	0.179382
