# Supplementary material for: Nicotine enhances the stemness and tumorigenicity in intestinal stem cells via Hippo-YAP/TAZ and Notch signal pathway
Source: eLife. 2025 Jan 3;13:RP95267. doi: 10.7554/eLife.95267 (PMC11698494; doi:10.7554/eLife.95267)
Supplement: Figure 6—source data 1. [file elife-95267-fig6-data1.xlsx]

## Sheet: Figure 6C
	Count	Control Vehicle	Control DBZ	NIC Vehicle	NIC DBZ
	①	14	14.86	18.06	14.24
	②	13.8	13.08	18.86	13.22
	③	13.18	12.6	18.1	13.42
	AVERAGE(ratio)	13.66	13.5133	18.34	13.6267
	SE(ratio)	0.246847	0.687443	0.260256	0.312054

## Sheet: Figure 6D
	Count	Control Vehicle	Control DBZ	NIC Vehicle	NIC DBZ
	①	4.12	4.64	5.7	4.44
	②	4.6	4.54	6.68	4.34
	③	4.54	4.58	6.02	4.26
	AVERAGE(ratio)	4.42	4.58667	6.13333	4.34667
	SE(ratio)	0.150997	0.0290593	0.288521	0.0520683
