# Supplementary material for: Nicotine enhances the stemness and tumorigenicity in intestinal stem cells via Hippo-YAP/TAZ and Notch signal pathway
Source: eLife. 2025 Jan 3;13:RP95267. doi: 10.7554/eLife.95267 (PMC11698494; doi:10.7554/eLife.95267)
Supplement: Figure 7—source data 1. [file elife-95267-fig7-data1.xlsx]

## Sheet: Figure 7B
	Number of polyps	Control	NIC		Total Polyp Surface	Control	NIC
	①	24	46		①	30.5081	51.2066
	②	28	52		②	28.0065	71.3685
	③	26	36		③	17.7655	46.1565
	④	19	40		④	14.6265	34.3859
	⑤	29	52		⑤	26.2986	86.4432
	AVERAGE	27	45.2		AVERAGE	23.441	57.9122
	SE	1.772	3.2		SE	3.07295	9.3052

## Sheet: Figure 7C
	Count	Control	NIC
	①	4	71
	②	6	34
	③	0	23
	④	10	58
	⑤	2	86
	AVERAGE	4.4	54.4
	SE	1.72047	11.5957

## Sheet: Figure 7E
	Number of polyps	Control Vehicle	Control DBZ	NIC Vehicle	NIC DBZ
	①	8	17	41	15
	②	10	12	25	7
	③	11	8	29	12
	④	9	9	27	14
	AVERAGE	9.5	11.5	30.5	12
	SE	0.5	1.56525	2.78388	1.3784

## Sheet: Figure 7F
	Count	Control Vehicle	Control DBZ	NIC Vehicle	NIC DBZ
	①	5	6	57	1
	②	5	8	73	6
	③	2	0	50	5
	AVERAGE	4	4.66667	60	4
	SE	1	2.4037	6.80686	1.52753
