# Supplementary figures and images for: Nicotine enhances the stemness and tumorigenicity in intestinal stem cells via Hippo-YAP/TAZ and Notch signal pathway
Source: eLife journal article supplement (doi:10.7554/elife.95267), 2024-03-18

**Figure 3D      $\beta$ -Actin**

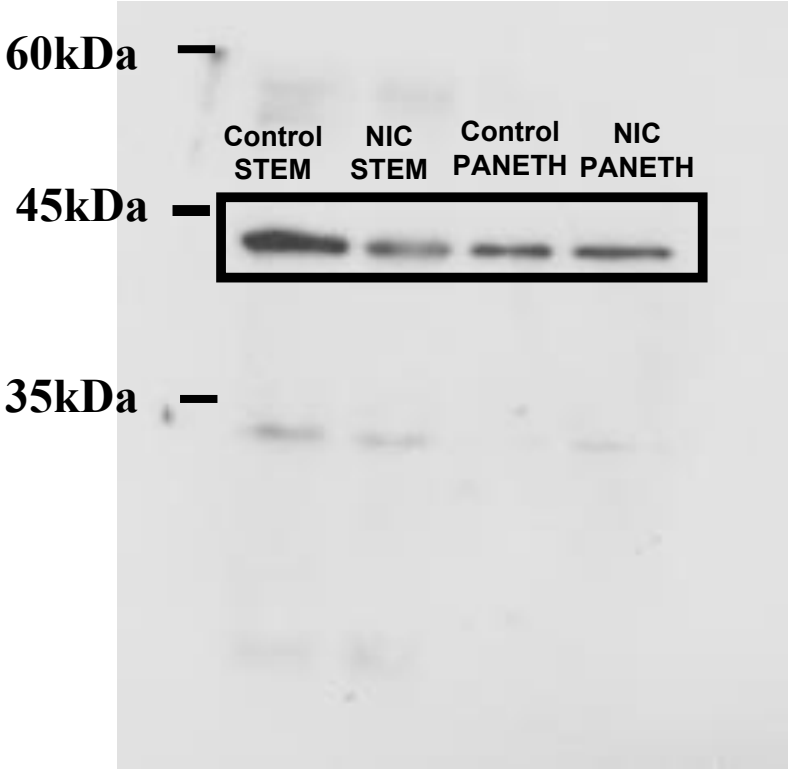

Supplement: fig3-data2 [file elife-95267-fig3-data2-v1.zip]

Figure 3D      $\alpha 7$ -nAChR

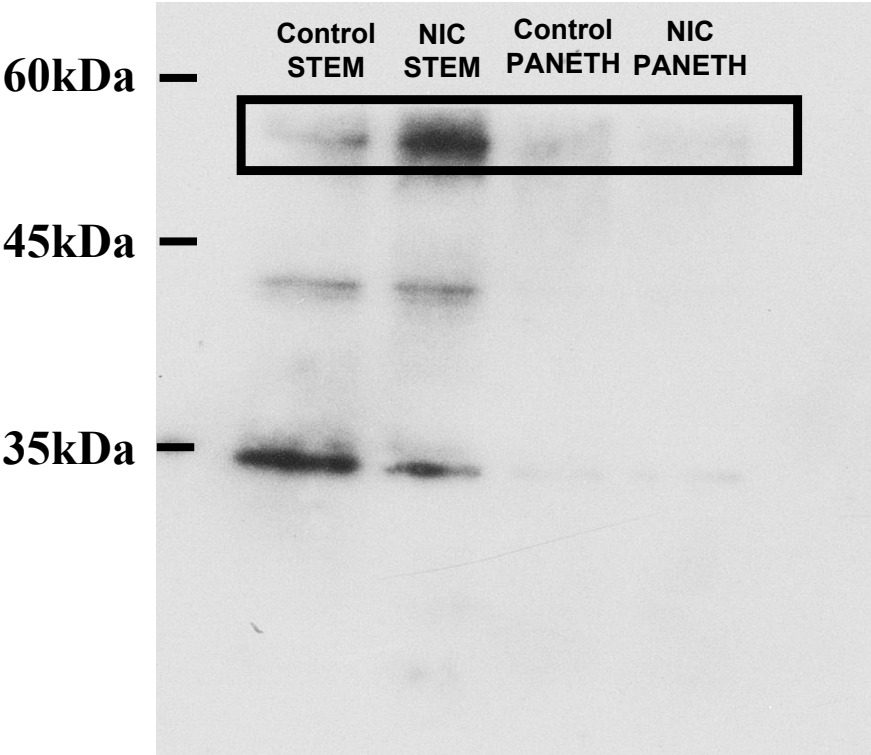

Supplement: fig3-data2 [file elife-95267-fig3-data2-v1.zip]

**Figure 3D**      **$\beta$ -Actin**

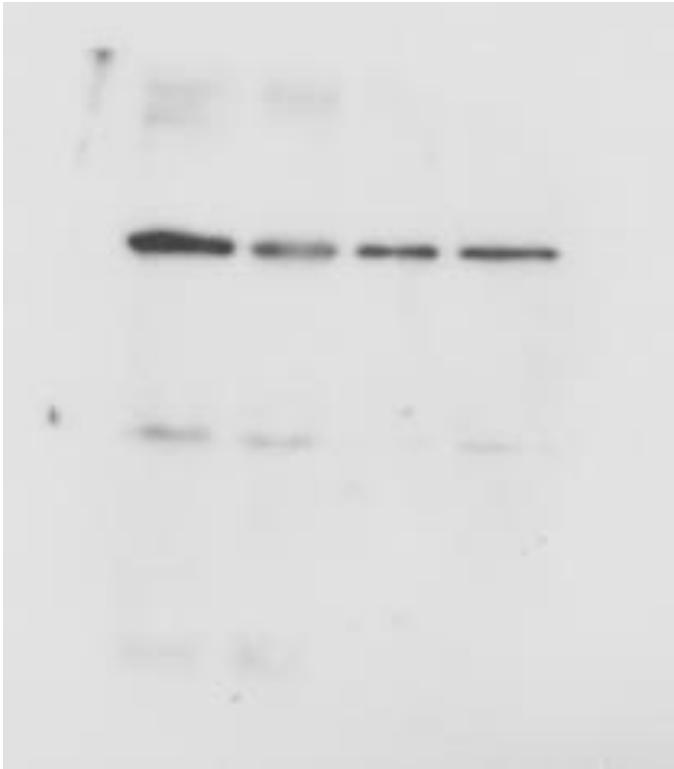

Supplement: fig3-data3 [file elife-95267-fig3-data3-v1.zip]

**Figure 3D**     $\alpha 7$ -nAChR

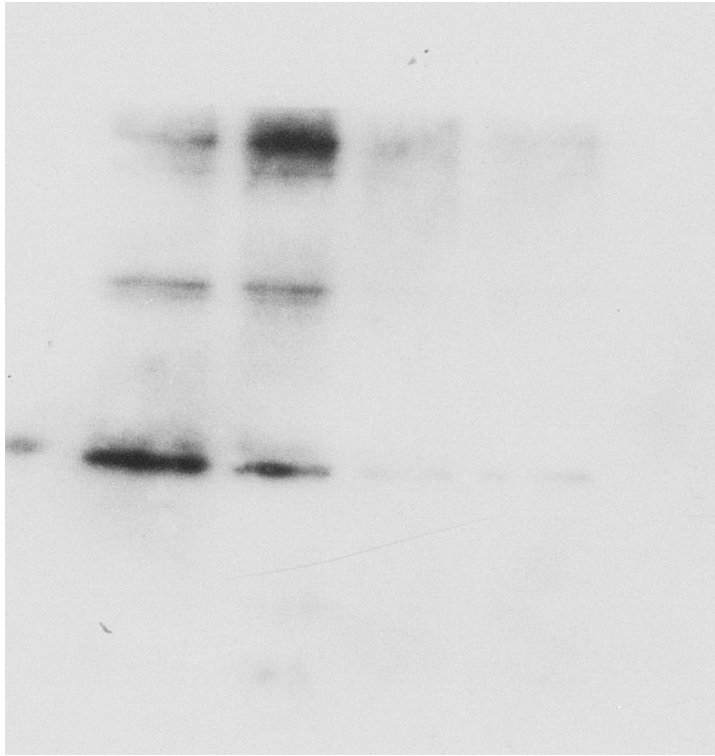

Supplement: fig3-data3 [file elife-95267-fig3-data3-v1.zip]

**Figure 4C YAP**

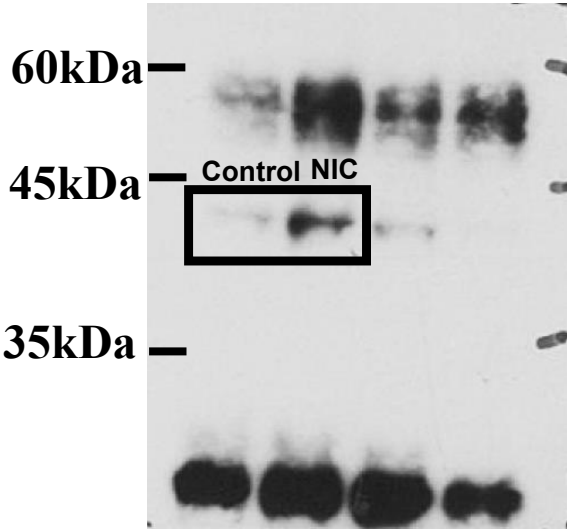

Supplement: fig4-data2 [file elife-95267-fig4-data2-v1.zip]

**Figure 4E      $\beta$ -Actin**

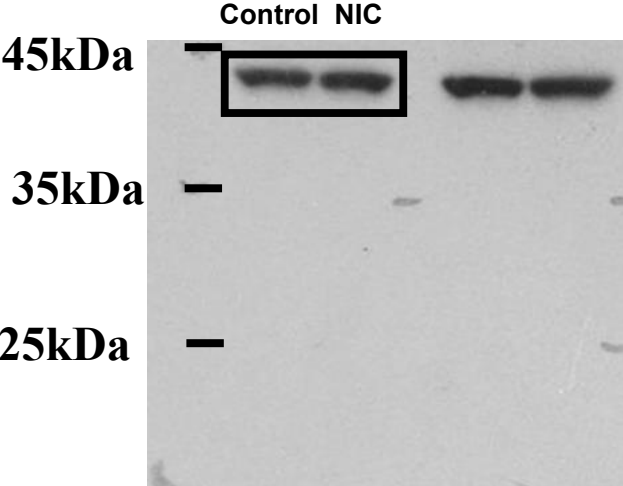

Supplement: fig4-data2 [file elife-95267-fig4-data2-v1.zip]

**Figure 4E Jagged2**

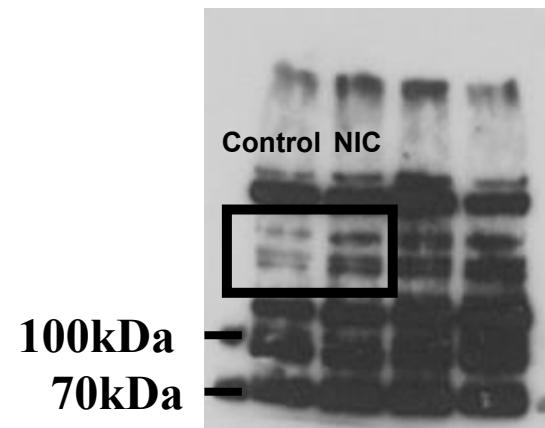

Supplement: fig4-data2 [file elife-95267-fig4-data2-v1.zip]

Figure 4C  $\beta$ -Actin

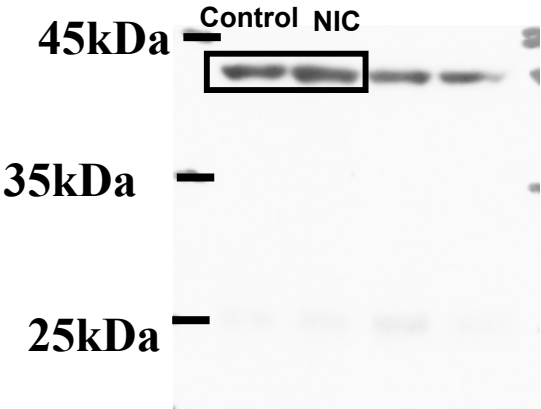

Supplement: fig4-data2 [file elife-95267-fig4-data2-v1.zip]

**Figure 4E Notch1**

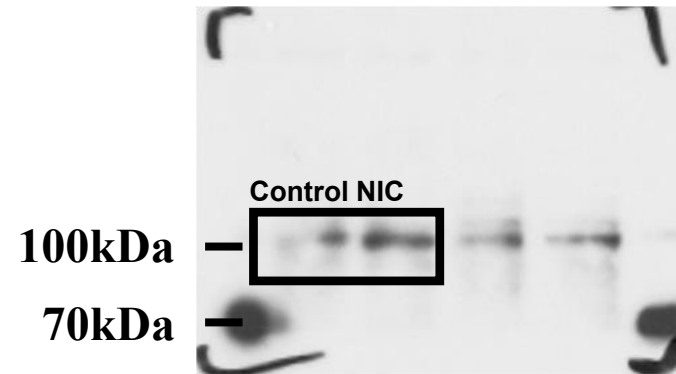

Supplement: fig4-data2 [file elife-95267-fig4-data2-v1.zip]

Figure 4C    TAZ

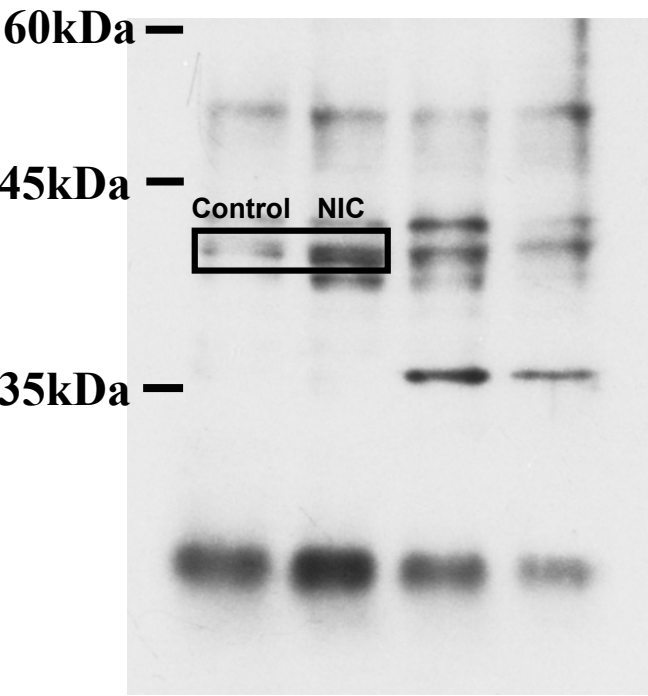

Supplement: fig4-data2 [file elife-95267-fig4-data2-v1.zip]

**Figure 4E**    **Hes5**

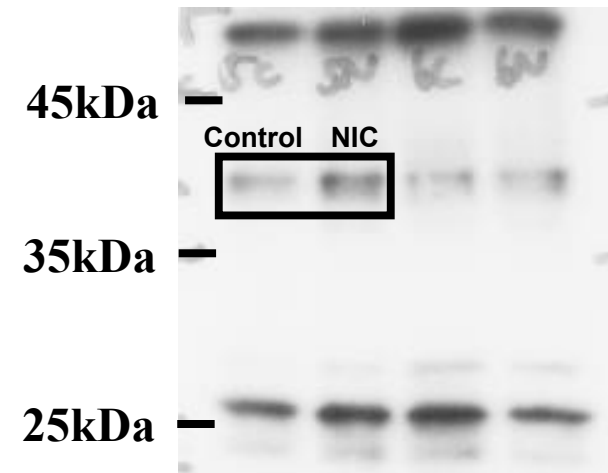

Supplement: fig4-data2 [file elife-95267-fig4-data2-v1.zip]

**Figure 4E Jagged1**

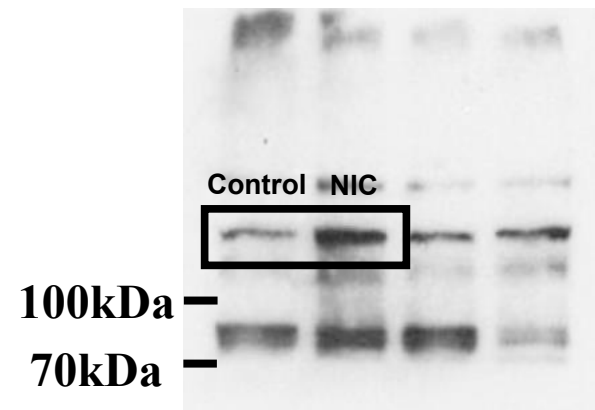

Supplement: fig4-data2 [file elife-95267-fig4-data2-v1.zip]

**Figure 4E**    **Hes5**

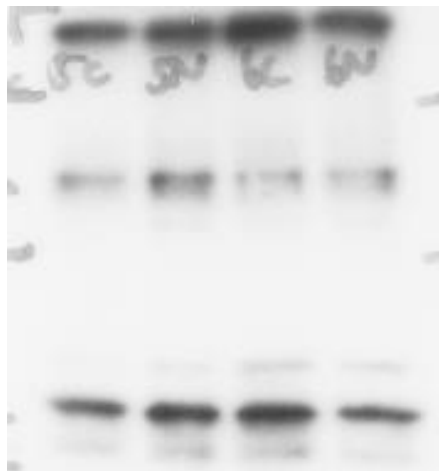

Supplement: fig4-data3 [file elife-95267-fig4-data3-v1.zip]

**Figure 4E** Notch1

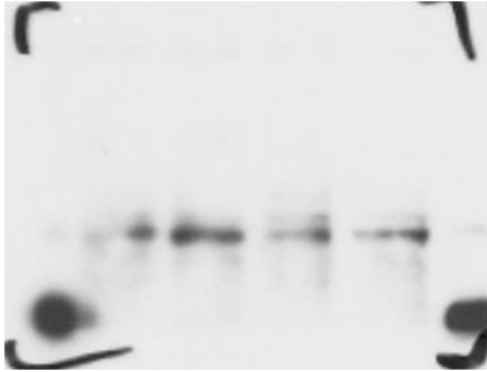

Supplement: fig4-data3 [file elife-95267-fig4-data3-v1.zip]

**Figure 4C  $\beta$ -Actin**

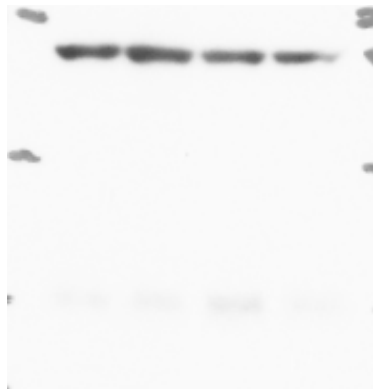

Supplement: fig4-data3 [file elife-95267-fig4-data3-v1.zip]

**Figure 4E**      **$\beta$ -Actin**

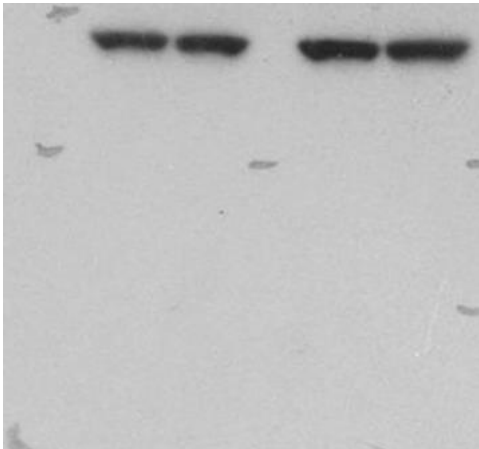

Supplement: fig4-data3 [file elife-95267-fig4-data3-v1.zip]

**Figure 4C    TAZ**

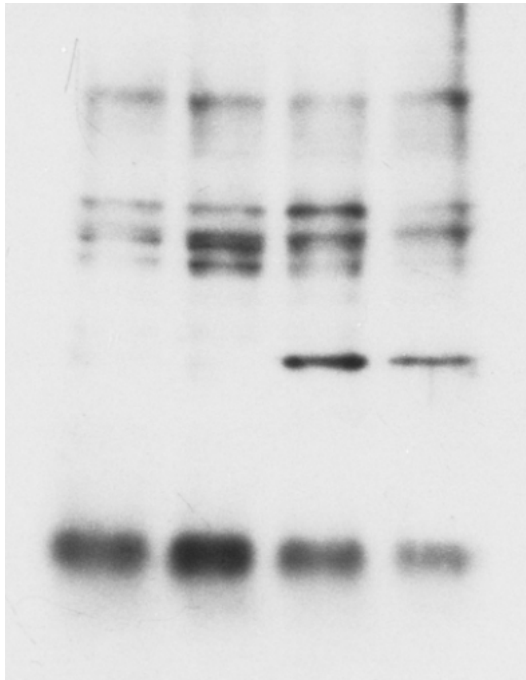

Supplement: fig4-data3 [file elife-95267-fig4-data3-v1.zip]

**Figure 4E Jagged1**

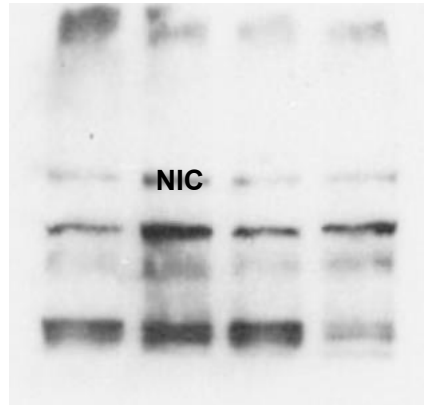

Supplement: fig4-data3 [file elife-95267-fig4-data3-v1.zip]

**Figure 4E Jagged2**

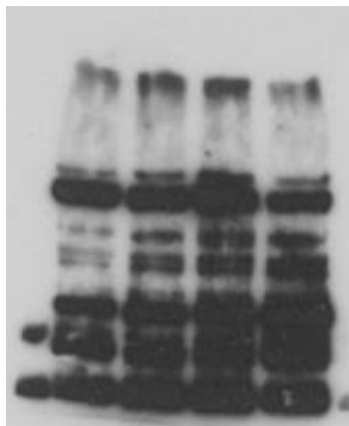

Supplement: fig4-data3 [file elife-95267-fig4-data3-v1.zip]

**Figure 4C** YAP

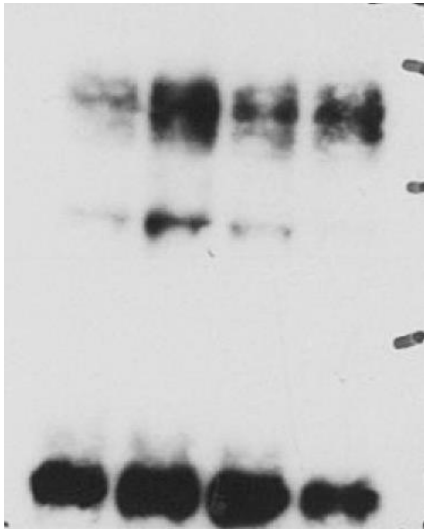

Supplement: fig4-data3 [file elife-95267-fig4-data3-v1.zip]

**Figure 4-Figure Supplemental 1      S6**

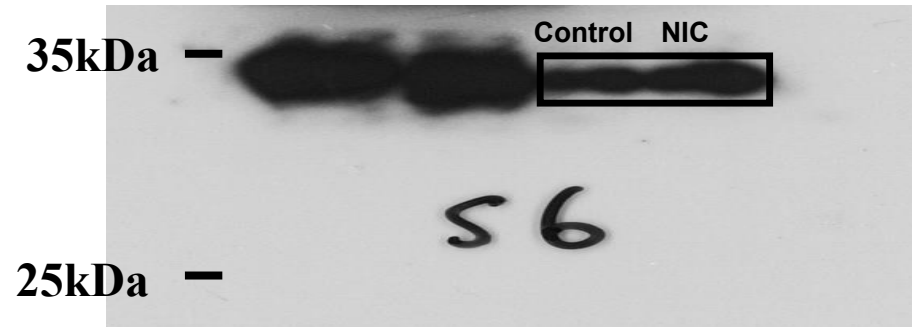

Supplement: fig4-figsupp1-data2 [file elife-95267-fig4-figsupp1-data2-v1.zip]

**Figure 4-Figure Supplemental 1**      **p-p38**

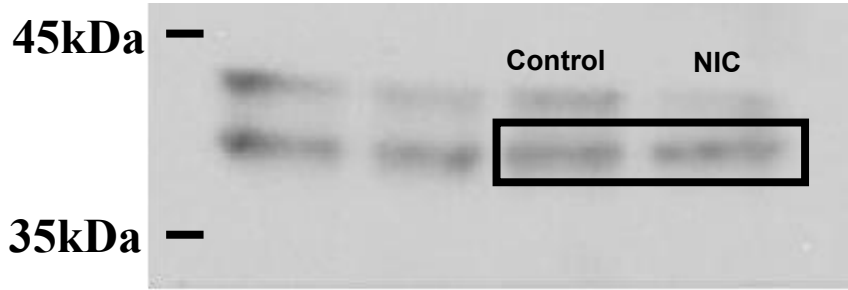

Supplement: fig4-figsupp1-data2 [file elife-95267-fig4-figsupp1-data2-v1.zip]

Figure 4-Figure Supplemental 1 p38

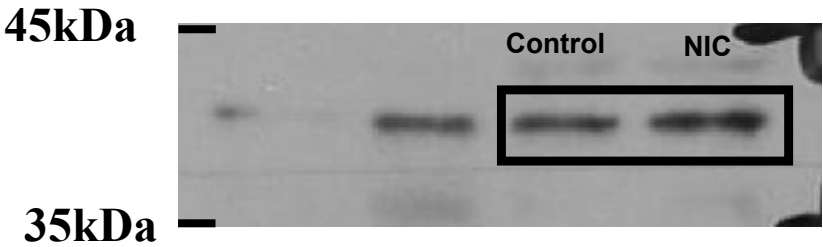

Supplement: fig4-figsupp1-data2 [file elife-95267-fig4-figsupp1-data2-v1.zip]

**Figure 4-Figure Supplemental 1**      **p-S6**

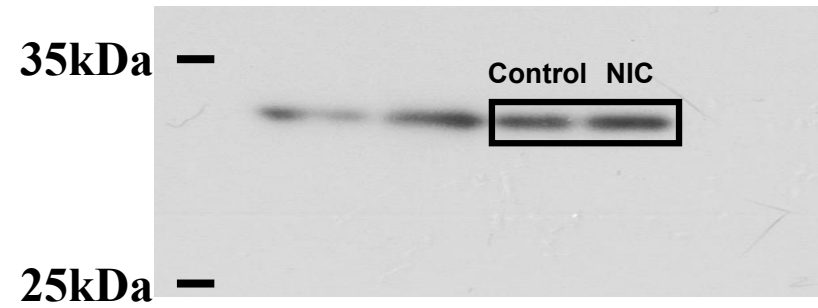

Supplement: fig4-figsupp1-data2 [file elife-95267-fig4-figsupp1-data2-v1.zip]

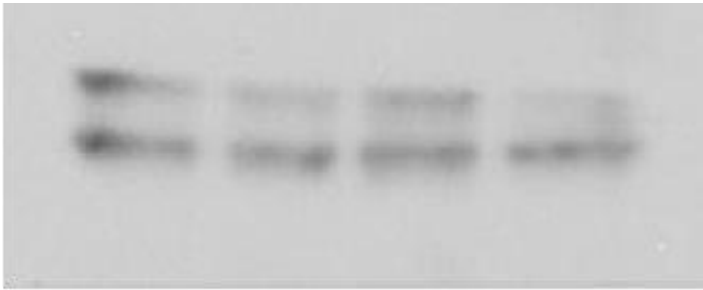

Supplement: fig4-figsupp1-data3 [file elife-95267-fig4-figsupp1-data3-v1.zip]

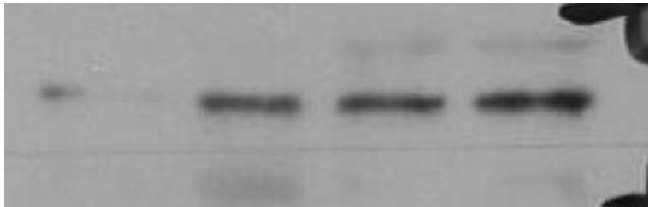

Supplement: fig4-figsupp1-data3 [file elife-95267-fig4-figsupp1-data3-v1.zip]

**Figure 4B Supplemental p-S6**

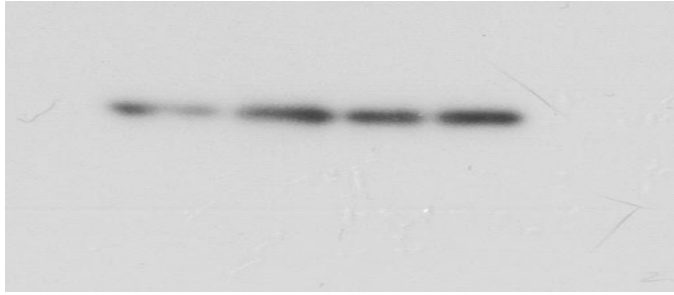

Supplement: fig4-figsupp1-data3 [file elife-95267-fig4-figsupp1-data3-v1.zip]

**Figure 4-Figure Supplemental 1 S6**

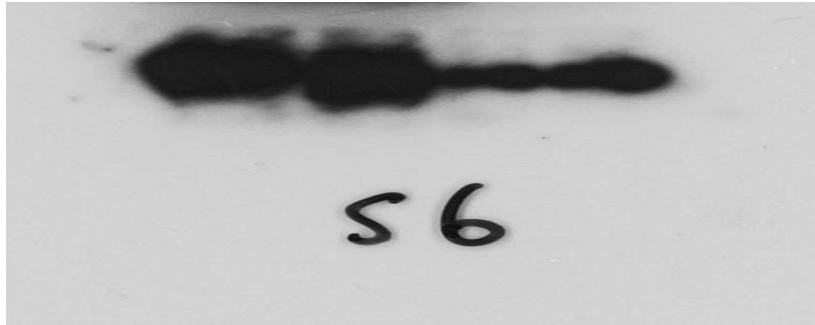

Supplement: fig4-figsupp1-data3 [file elife-95267-fig4-figsupp1-data3-v1.zip]

**Figure 6B**     **YAP**

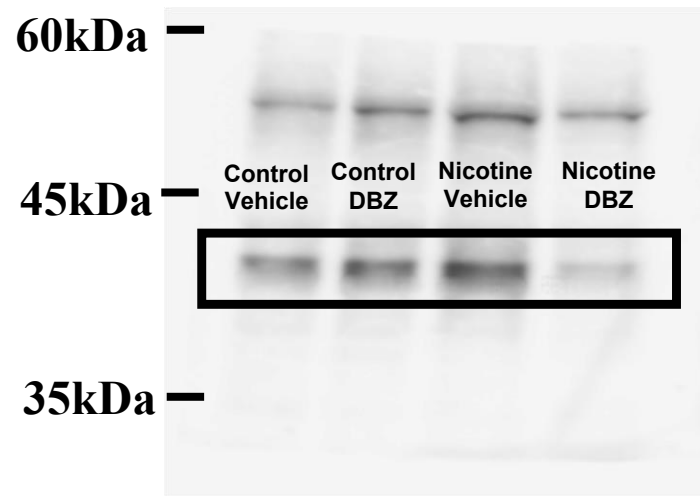

Supplement: fig6-data2 [file elife-95267-fig6-data2-v1.zip]

**Figure6B      Hes5**

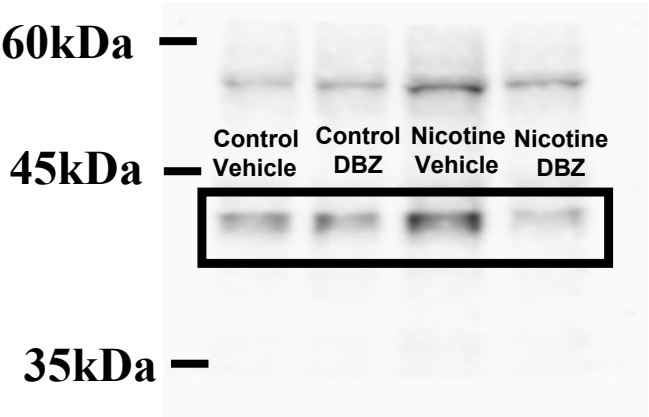

Supplement: fig6-data2 [file elife-95267-fig6-data2-v1.zip]

**Figure6B    TAZ**

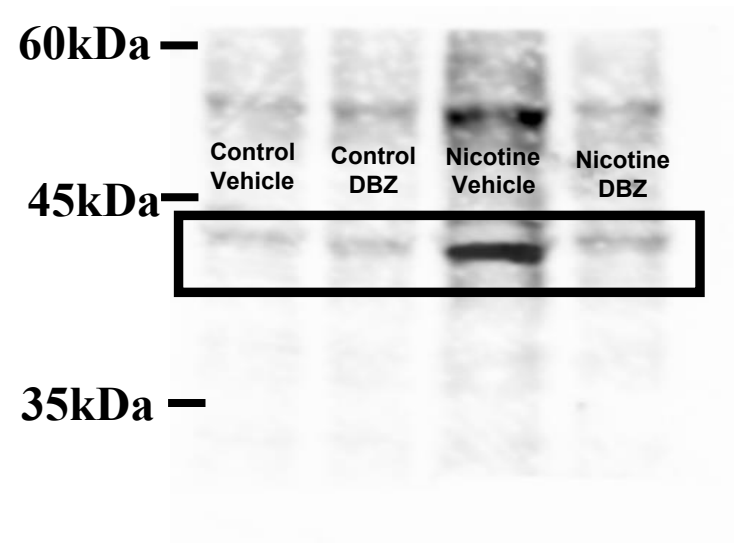

Supplement: fig6-data2 [file elife-95267-fig6-data2-v1.zip]

**Figure 6B**       **$\beta$ -Actin**

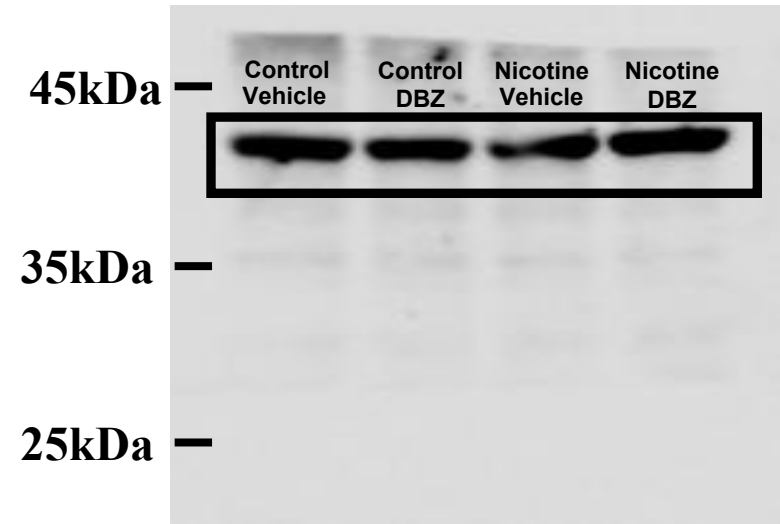

Supplement: fig6-data2 [file elife-95267-fig6-data2-v1.zip]

**Figure6B      Hes5**

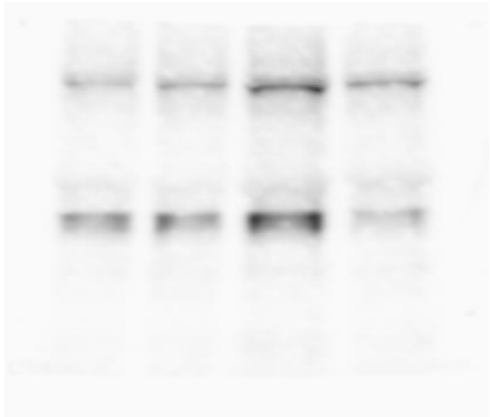

Supplement: fig6-data3 [file elife-95267-fig6-data3-v1.zip]

**Figure 6B**       **$\beta$ -Actin**

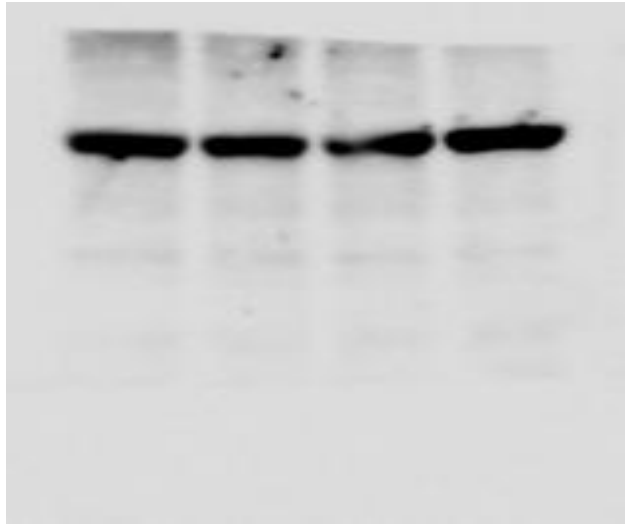

Supplement: fig6-data3 [file elife-95267-fig6-data3-v1.zip]

**Figure6B    TAZ**

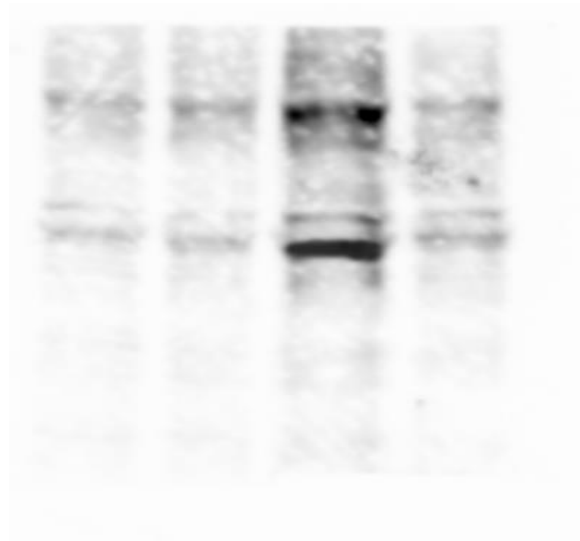

Supplement: fig6-data3 [file elife-95267-fig6-data3-v1.zip]

**Figure 6B**     YAP

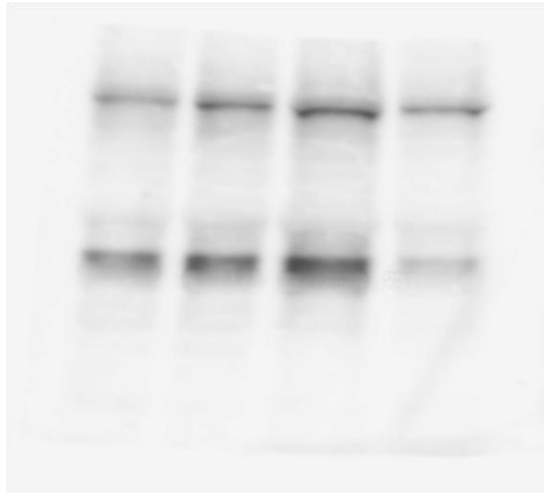

Supplement: fig6-data3 [file elife-95267-fig6-data3-v1.zip]
